# Supplementary material for: Using Claims Data to Assess Treatment Quality of First-Episode Psychosis
Source: Atypon-hosted journal article supplement (doi:10.1176/appi.ps.201900595), 2020-11-10
Supplement: appi.ps.201900595.ds001.pdf [file appi.ps.201900595.ds001.pdf]

## Online Supplement

List of the Diagnostic Codes used to identify individuals with first episode psychosis.

| <b>Diagnosis Code</b> | <b>Diagnosis Description</b> | <b>ICD Version</b> |
|-----------------------|------------------------------|--------------------|
| 2950                  | SIMPLE TYPE SCHIZOPHRENIA    | 9                  |
| 29500                 | SIMPLE SCHIZOPHRENIA UNSPEC  | 9                  |
| 29501                 | SIMPLE SCHIZOPHRENIA SUBCHR  | 9                  |
| 29502                 | SIMPLE SCHIZOPHRENIA CHRON   | 9                  |
| 29503                 | SIMP SCHIZOPHR SUBCHR/EXACER | 9                  |
| 29504                 | SIMP SCHIZOPHREN CHR/EXACERB | 9                  |
| 29505                 | SIMP SCHIZOPHRENIA REMISSION | 9                  |
| 2951                  | DISORGANIZED SCHIZOPHRENIA   | 9                  |
| 29510                 | HEBEPHRENIA UNSPEC           | 9                  |
| 29511                 | HEBEPHRENIA SUBCHRONIC       | 9                  |
| 29512                 | HEBEPHRENIA CHRONIC          | 9                  |
| 29513                 | HEBEPHRENIA SUBCHR/EXACERB   | 9                  |
| 29514                 | HEBEPHRENIA CHR/EXACERB      | 9                  |
| 29515                 | HEBEPHRENIA REMISSION        | 9                  |
| 2953                  | PARANOID TYPE SCHIZOPHRENIA  | 9                  |
| 29530                 | PARANOID SCHIZOPHREN UNSPEC  | 9                  |
| 29531                 | PARANOID SCHIZOPHREN SUBCHR  | 9                  |
| 29532                 | PARANOID SCHIZOPHREN CHRONIC | 9                  |
| 29533                 | PARA SCHIZOPHREN SUBCHR/EXAC | 9                  |
| 29534                 | PARAN SCHIZOPHREN CHR/EXAC   | 9                  |
| 29535                 | PARANOID SCHIZOPHREN REMISS  | 9                  |
| 2954                  | SCHIZOPHRENIFORM DISORDER    | 9                  |
| 29540                 | SCHIZOPHRENIFORM UNSPEC      | 9                  |
| 29541                 | SCHIZOPHRENIFORM SUBCHR      | 9                  |
| 29542                 | SCHIZOPHRENIFORM CHR         | 9                  |
| 29543                 | SCHIZOPHRENIFM SUBCHR/EXAC   | 9                  |
| 29544                 | SCHIZOPHRENIFORM CHR/EXAC    | 9                  |
| 29545                 | SCHIZOPHRENIFORM REMISS      | 9                  |
| 2956                  | SCHIZOPHRENIC DIS RESIDUAL   | 9                  |
| 29560                 | SCHIZOPHR RESIDUAL UNS       | 9                  |
| 29561                 | SCHIZOPHR RESID SUBCHRONIC   | 9                  |
| 29562                 | SCHIZOPHR RESID CHRONIC      | 9                  |
| 29563                 | SCHIZOPHR RESID SUBCHR EXAC  | 9                  |
| 29564                 | SCHIZOPHR RESID CHRON EXAC   | 9                  |
| 29565                 | SCHIZOPHR RESID IN REMISSION | 9                  |
| 2957                  | SCHIZOAFFECTIVE DISORDER     | 9                  |
| 29570                 | SCHIZOAFFECTIVE UNSPEC       | 9                  |
| 29571                 | SCHIZOAFFECTIVE SUBCHR       | 9                  |

|       |                                           |    |
|-------|-------------------------------------------|----|
| 29572 | SCHIZOAFFECTIVE CHRONIC                   | 9  |
| 29573 | SCHIZOAFFECTIVE SUBCHR/EXAC               | 9  |
| 29574 | SCHIZOAFFECT CHR/EXACER                   | 9  |
| 29575 | SCHIZOAFFECT REMISSION                    | 9  |
| 2959  | UNSPECIFIED SCHIZOPHRENIA                 | 9  |
| 29590 | SCHIZOPHRENIA UNSPEC                      | 9  |
| 29591 | SCHIZOPHRENIA UNSP SUBCHR                 | 9  |
| 29592 | SCHIZOPHRENIA UNSP CHR                    | 9  |
| 29593 | SCHIZOPHREN UNSP SUBCHR/EXAC              | 9  |
| 29594 | SCHIZOPHRENIA UNS CHR/EXAC                | 9  |
| 29595 | SCHIZOPHRENIA UNSP REMISS                 | 9  |
| F200  | Paranoid schizophrenia                    | 10 |
| F201  | Disorganized schizophrenia                | 10 |
| F203  | Undifferentiated schizophrenia            | 10 |
| F205  | Residual schizophrenia                    | 10 |
| F2081 | Schizophreniform disorder                 | 10 |
| F209  | Schizophrenia, unspecified                | 10 |
| F250  | Schizoaffective disorder, bipolar type    | 10 |
| F251  | Schizoaffective disorder, depressive type | 10 |
| F258  | Other schizoaffective disorders           | 10 |
| F259  | Schizoaffective disorder, unspecified     | 10 |

List of the procedure codes for each quality indicator

| Quality Indicator | Category Description        | Procedure Code | Procedure Code Description   |
|-------------------|-----------------------------|----------------|------------------------------|
| 1,8               | Antipsychotic Service Claim | C9470          | ARIPIRAZOLE LAUROXIL IM      |
| 1,8               | Antipsychotic Service Claim | J0401          | INJ ARIPIRAZOLE EXT REL 1MG  |
| 1,8               | Antipsychotic Service Claim | J1631          | Haloperidol Decanoate Inj    |
| 1,8               | Antipsychotic Service Claim | J2358          | OLANZAPINE LONG-ACTING INJ   |
| 1,8               | Antipsychotic Service Claim | J2426          | PALIPERIDONE PALMITATE INJ   |
| 1,8               | Antipsychotic Service Claim | J2680          | Fluphenazine Decanoate 25 Mg |
| 1,8               | Antipsychotic Service Claim | J2794          | Risperidone, Long Acting     |
| 2                 | Medication Review           | 99205          | OFFICE/OUTPATIENT VISIT, NEW |
| 2                 | Medication Review           | 99211          | OFFICE/OUTPATIENT VISIT, EST |
| 2                 | Medication Review           | 99212          | OFFICE/OUTPATIENT VISIT, EST |
| 2                 | Medication Review           | 99213          | OFFICE/OUTPATIENT VISIT, EST |

|   |                   |       |                                         |
|---|-------------------|-------|-----------------------------------------|
| 2 | Medication Review | 99214 | OFFICE/OUTPATIENT VISIT, EST            |
| 2 | Medication Review | 99215 | OFFICE/OUTPATIENT VISIT, EST            |
| 2 | Medication Review | 99217 | OBSERVATION CARE<br>DISCHARGE           |
| 2 | Medication Review | 99218 | OBSERVATION CARE                        |
| 2 | Medication Review | 99219 | OBSERVATION CARE                        |
| 2 | Medication Review | 99220 | OBSERVATION CARE                        |
| 2 | Medication Review | 99221 | INITIAL HOSPITAL CARE                   |
| 2 | Medication Review | 99222 | INITIAL HOSPITAL CARE                   |
| 2 | Medication Review | 99223 | INITIAL HOSPITAL CARE                   |
| 2 | Medication Review | 99224 | SBSQ OBSERVATION<br>CARE/DAY 15 MINUTES |
| 2 | Medication Review | 99225 | SBSQ OBSERVATION<br>CARE/DAY 25 MINUTES |
| 2 | Medication Review | 99226 | SBSQ OBSERVATION<br>CARE/DAY 35 MINUTES |
| 2 | Medication Review | 99231 | SUBSEQUENT HOSPITAL CARE                |
| 2 | Medication Review | 99232 | SUBSEQUENT HOSPITAL CARE                |
| 2 | Medication Review | 99233 | SUBSEQUENT HOSPITAL CARE                |
| 2 | Medication Review | 99234 | OBSERV/HOSP SAME DATE                   |
| 2 | Medication Review | 99235 | OBSERV/HOSP SAME DATE                   |
| 2 | Medication Review | 99236 | OBSERV/HOSP SAME DATE                   |
| 2 | Medication Review | 99238 | HOSPITAL DISCHARGE DAY                  |
| 2 | Medication Review | 99239 | HOSPITAL DISCHARGE DAY                  |
| 2 | Medication Review | 99241 | OFFICE CONSULTATION                     |
| 2 | Medication Review | 99242 | OFFICE CONSULTATION                     |
| 2 | Medication Review | 99243 | OFFICE CONSULTATION                     |
| 2 | Medication Review | 99244 | OFFICE CONSULTATION                     |
| 2 | Medication Review | 99245 | OFFICE CONSULTATION                     |
| 2 | Medication Review | 99251 | INPATIENT CONSULTATION                  |
| 2 | Medication Review | 99252 | INPATIENT CONSULTATION                  |
| 2 | Medication Review | 99253 | INPATIENT CONSULTATION                  |
| 2 | Medication Review | 99254 | INPATIENT CONSULTATION                  |
| 2 | Medication Review | 99255 | INPATIENT CONSULTATION                  |
| 2 | Medication Review | 99304 | NURSING FACILITY CARE, INIT             |
| 2 | Medication Review | 99305 | NURSING FACILITY CARE, INIT             |
| 2 | Medication Review | 99306 | NURSING FACILITY CARE, INIT             |
| 2 | Medication Review | 99307 | NURSING FAC CARE, SUBSEQ                |
| 2 | Medication Review | 99308 | NURSING FAC CARE, SUBSEQ                |
| 2 | Medication Review | 99309 | NURSING FAC CARE, SUBSEQ                |
| 2 | Medication Review | 99310 | NURSING FAC CARE, SUBSEQ                |
| 2 | Medication Review | 99315 | NURSING FAC DISCHARGE DAY               |
| 2 | Medication Review | 99316 | NURSING FAC DISCHARGE DAY               |

|   |                   |       |                              |
|---|-------------------|-------|------------------------------|
| 2 | Medication Review | 99318 | ANNUAL NURSING FAC ASSESSMNT |
| 2 | Medication Review | 99324 | DOMICIL/R-HOME VISIT NEW PAT |
| 2 | Medication Review | 99325 | DOMICIL/R-HOME VISIT NEW PAT |
| 2 | Medication Review | 99326 | DOMICIL/R-HOME VISIT NEW PAT |
| 2 | Medication Review | 99327 | DOMICIL/R-HOME VISIT NEW PAT |
| 2 | Medication Review | 99328 | DOMICIL/R-HOME VISIT NEW PAT |
| 2 | Medication Review | 99334 | DOMICIL/R-HOME VISIT EST PAT |
| 2 | Medication Review | 99335 | DOMICIL/R-HOME VISIT EST PAT |
| 2 | Medication Review | 99336 | DOMICIL/R-HOME VISIT EST PAT |
| 2 | Medication Review | 99337 | DOMICIL/R-HOME VISIT EST PAT |
| 2 | Medication Review | 99339 | DOMICIL/R-HOME CARE SUPERVIS |
| 2 | Medication Review | 99340 | DOMICIL/R-HOME CARE SUPERVIS |
| 2 | Medication Review | 99341 | HOME VISIT, NEW PATIENT      |
| 2 | Medication Review | 99342 | HOME VISIT, NEW PATIENT      |
| 2 | Medication Review | 99343 | HOME VISIT, NEW PATIENT      |
| 2 | Medication Review | 99344 | HOME VISIT, NEW PATIENT      |
| 2 | Medication Review | 99345 | HOME VISIT, NEW PATIENT      |
| 2 | Medication Review | 99347 | HOME VISIT, EST PATIENT      |
| 2 | Medication Review | 99348 | HOME VISIT, EST PATIENT      |
| 2 | Medication Review | 99349 | HOME VISIT, EST PATIENT      |
| 2 | Medication Review | 99350 | HOME VISIT, EST PATIENT      |
| 2 | Medication Review | 99354 | PROLONGED SERVICE, OFFICE    |
| 2 | Medication Review | 99355 | PROLONGED SERVICE, OFFICE    |
| 2 | Medication Review | 99356 | PROLONGED SERVICE, INPATIENT |
| 2 | Medication Review | 99357 | PROLONGED SERVICE, INPATIENT |
| 2 | Medication Review | 99358 | PROLONGED SERV, W/O CONTACT  |
| 2 | Medication Review | 99359 | PROLONGED SERV, W/O CONTACT  |
| 2 | Medication Review | 99360 | PHYSICIAN STANDBY SERVICES   |
| 2 | Medication Review | 99363 | ANTICOAG MGMT, INIT          |

|   |                   |       |                                                           |
|---|-------------------|-------|-----------------------------------------------------------|
| 2 | Medication Review | 99364 | ANTICOAG MGMT, SUBSEQ                                     |
| 2 | Medication Review | 99366 | TEAM CONF W/PAT BY HC PRO                                 |
| 2 | Medication Review | 99367 | TEAM CONF W/O PAT BY PHYS                                 |
| 2 | Medication Review | 99368 | TEAM CONF W/O PAT BY HC PRO                               |
| 2 | Medication Review | 99605 | MTMS BY PHARM, NP, 15 MIN                                 |
| 2 | Medication Review | 99606 | MTMS BY PHARM, EST, 15 MIN                                |
| 2 | Medication Review | 99607 | MTMS BY PHARM, ADDL 15 MIN                                |
| 2 | Medication Review | H2010 | Comprehensive Med Svc 15 Min                              |
| 3 | Psychotherapy     | 90785 | Interactive complexity                                    |
| 3 | Psychotherapy     | 90791 | Psychiatric diagnostic evaluation (no medical services)   |
| 3 | Psychotherapy     | 90792 | Psychiatric diagnostic evaluation (with medical services) |
| 3 | Psychotherapy     | 90832 | Psychotherapy, 30 minutes                                 |
| 3 | Psychotherapy     | 90833 | 30 minutes psychotherapy                                  |
| 3 | Psychotherapy     | 90834 | Psychotherapy, 45 minutes                                 |
| 3 | Psychotherapy     | 90836 | 45 minutes psychotherapy                                  |
| 3 | Psychotherapy     | 90837 | Psychotherapy, 60 minutes                                 |
| 3 | Psychotherapy     | 90838 | 60 minutes psychotherapy                                  |
| 3 | Psychotherapy     | 90839 | Psychotherapy for crisis, first 60 minutes                |
| 3 | Psychotherapy     | 90840 | Crisis Code, each additional 30 minutes                   |
| 3 | Psychotherapy     | 90846 | FAMILY PSYTX W/O PATIENT                                  |
| 3 | Psychotherapy     | 90847 | FAMILY PSYTX W/PATIENT                                    |
| 3 | Psychotherapy     | 90849 | MULTIPLE FAMILY GROUP PSYTX                               |
| 3 | Psychotherapy     | 90853 | GROUP PSYCHOTHERAPY                                       |
| 3 | Psychotherapy     | 99354 | PROLONGED SERVICE, OFFICE                                 |
| 3 | Psychotherapy     | 99355 | PROLONGED SERVICE, OFFICE                                 |
| 8 | Cholesterol Test  | 3048F | LDL-C <100 Mg/dl                                          |
| 8 | Cholesterol Test  | 3049F | LDL-C 100-129 Mg/dl                                       |
| 8 | Cholesterol Test  | 3050F | LDL-C = 130 Mg/dl                                         |
| 8 | Cholesterol Test  | 80061 | LIPID PANEL                                               |
| 8 | Cholesterol Test  | 82465 | ASSAY, BLD/SERUM CHOLESTEROL                              |
| 8 | Cholesterol Test  | 83700 | LIOPRO BLD, ELECTROPHORETIC                               |
| 8 | Cholesterol Test  | 83701 | LIOPROTEIN BLD, HR FRACTION                               |
| 8 | Cholesterol Test  | 83704 | LIOPROTEIN, BLD, BY NMR                                   |
| 8 | Cholesterol Test  | 83718 | ASSAY OF LIOPROTEIN                                       |
| 8 | Cholesterol Test  | 83721 | ASSAY OF BLOOD                                            |

|    |                               |       |                                      |
|----|-------------------------------|-------|--------------------------------------|
|    |                               |       | LIPOPROTEIN                          |
| 8  | Cholesterol Test              | 84478 | ASSAY OF TRIGLYCERIDES               |
| 8  | Glucose Test                  | 3044F | Hg A1c Level Lt 7.0%                 |
| 8  | Glucose Test                  | 3045F | Hg A1c Level 7.0–9.0%                |
| 8  | Glucose Test                  | 3046F | Hemoglobin A1c Level > 9.0%          |
| 8  | Glucose Test                  | 80047 | METABOLIC PANEL IONIZED<br>CA        |
| 8  | Glucose Test                  | 80048 | METABOLIC PANEL TOTAL CA             |
| 8  | Glucose Test                  | 80050 | GENERAL HEALTH PANEL                 |
| 8  | Glucose Test                  | 80053 | COMPREHEN METABOLIC<br>PANEL         |
| 8  | Glucose Test                  | 80069 | RENAL FUNCTION PANEL                 |
| 8  | Glucose Test                  | 82947 | ASSAY, GLUCOSE, BLOOD<br>QUANT       |
| 8  | Glucose Test                  | 82950 | GLUCOSE TEST                         |
| 8  | Glucose Test                  | 82951 | GLUCOSE TOLERANCE TEST<br>(GTT)      |
| 8  | Glucose Test                  | 83036 | GLYCOSYLATED HEMOGLOBIN<br>TEST      |
| 8  | Glucose Test                  | 83037 | GLYCOSYLATED HB, HOME<br>DEVICE      |
| 8  | HbA1C Test                    | 3046F | Hemoglobin A1c Level > 9.0%          |
| 8  | HbA1C Test                    | 83036 | GLYCOSYLATED HEMOGLOBIN<br>TEST      |
| 8  | HbA1C Test                    | 83037 | GLYCOSYLATED HB, HOME<br>DEVICE      |
| 8  | Metabolic Screening           | H2010 | Comprehensive Med Svc 15 Min         |
| 8  | Metabolic Screening           | H2010 | Comprehensive Med Svc 15 Min         |
| 10 | Integrated Care<br>Delivery   | 90804 | PSYTX, OFFICE, 20-30 MIN             |
| 10 | Integrated Care<br>Delivery   | 90806 | PSYTX, OFF, 45-50 MIN                |
| 10 | Integrated Care<br>Delivery   | 90846 | FAMILY PSYTX W/O PATIENT             |
| 10 | Integrated Care<br>Delivery   | 90847 | FAMILY PSYTX W/PATIENT               |
| 10 | Integrated Care<br>Delivery   | 90849 | MULTIPLE FAMILY GROUP<br>PSYTX       |
| 10 | Integrated Care<br>Delivery   | 90853 | GROUP PSYCHOTHERAPY                  |
| 10 | Integrated Care<br>Delivery   | 90862 | MEDICATION MANAGEMENT                |
| 10 | Integrated Care<br>Delivery   | 99214 | OFFICE/OUTPATIENT VISIT, EST         |
| 11 | Substance Abuse<br>Monitoring | 80320 | DRUG SCREEN QUANTITATIVE<br>ALCOHOLS |

|    |                            |       |                                                 |
|----|----------------------------|-------|-------------------------------------------------|
| 11 | Substance Abuse Monitoring | 80321 | DRUG SCREEN QUANT ALCOHOLS BIOMARKERS 1 OR 2    |
| 11 | Substance Abuse Monitoring | 80322 | DRUG SCREEN QUANT ALCOHOLS BIOMARKERS 3 OR MORE |
| 11 | Substance Abuse Monitoring | 80324 | DRUG SCREEN QUANT AMPHETAMINES 1 OR 2           |
| 11 | Substance Abuse Monitoring | 80325 | DRUG SCREEN QUANT AMPHETAMINES 3 OR 4           |
| 11 | Substance Abuse Monitoring | 80326 | DRUG SCREEN QUANT AMPHETAMINES 5 OR MORE        |
| 11 | Substance Abuse Monitoring | 80375 | DRUG/SUBSTANCE DEFINITIVE QUAL/QUANT NOS 1-3    |
| 11 | Substance Abuse Monitoring | 80376 | DRUG/SUBSTANCE DEFINITIVE QUAL/QUANT NOS 4-6    |
| 11 | Substance Abuse Monitoring | 80377 | DRUG/SUBSTANCE DEFINITIVE QUAL/QUANT NOS 7/MORE |
| 11 | Substance Abuse Monitoring | 99408 | AUDIT/DAST, 15-30 MIN                           |
| 11 | Substance Abuse Monitoring | 99409 | AUDIT/DAST, OVER 30 MIN                         |
| 11 | Substance Abuse Monitoring | G0396 | Alcohol/Subs Interv 15-30mn                     |
| 11 | Substance Abuse Monitoring | G0397 | Alcohol/Subs Interv >30 Min                     |
| 11 | Substance Abuse Monitoring | G0442 | ANNUAL ALCOHOL SCREEN 15 MIN                    |
| 11 | Substance Abuse Monitoring | G0443 | BRIEF ALCOHOL MISUSE COUNSEL                    |
| 11 | Substance Abuse Monitoring | H0001 | Alcohol And/Or Drug Assess                      |
| 11 | Substance Abuse Monitoring | H0002 | Alcohol And/Or Drug Screenin                    |
| 11 | Substance Abuse Monitoring | H0003 | Alcohol And/Or Drug Screenin                    |
| 11 | Substance Abuse Monitoring | H0004 | Alcohol And/Or Drug Services                    |
| 11 | Substance Abuse Monitoring | H0005 | Alcohol And/Or Drug Services                    |
| 11 | Substance Abuse Monitoring | H0006 | Alcohol And/Or Drug Services                    |
| 11 | Substance Abuse Monitoring | H0007 | Alcohol And/Or Drug Services                    |
| 11 | Substance Abuse Monitoring | H0008 | Alcohol And/Or Drug Services                    |
| 11 | Substance Abuse Monitoring | H0009 | Alcohol And/Or Drug Services                    |

|    |                            |       |                              |
|----|----------------------------|-------|------------------------------|
|    | Monitoring                 |       |                              |
| 11 | Substance Abuse Monitoring | H0010 | Alcohol And/Or Drug Services |
| 11 | Substance Abuse Monitoring | H0011 | Alcohol And/Or Drug Services |
| 11 | Substance Abuse Monitoring | H0012 | Alcohol And/Or Drug Services |
| 11 | Substance Abuse Monitoring | H0013 | Alcohol And/Or Drug Services |
| 11 | Substance Abuse Monitoring | H0014 | Alcohol And/Or Drug Services |
| 11 | Substance Abuse Monitoring | H0015 | Alcohol And/Or Drug Services |
| 11 | Substance Abuse Monitoring | H0016 | Alcohol And/Or Drug Services |
| 11 | Substance Abuse Monitoring | H0017 | Alcohol And/Or Drug Services |
| 11 | Substance Abuse Monitoring | H0018 | Alcohol And/Or Drug Services |
| 11 | Substance Abuse Monitoring | H0019 | Alcohol And/Or Drug Services |
| 11 | Substance Abuse Monitoring | H0020 | Alcohol And/Or Drug Services |
| 11 | Substance Abuse Monitoring | H0021 | Alcohol And/Or Drug Training |
| 11 | Substance Abuse Monitoring | H0022 | Alcohol And/Or Drug Interven |
| 11 | Substance Abuse Monitoring | H0023 | Alcohol And/Or Drug Outreach |
| 11 | Substance Abuse Monitoring | H0024 | Alcohol And/Or Drug Preventi |
| 11 | Substance Abuse Monitoring | H0025 | Alcohol And/Or Drug Preventi |
| 11 | Substance Abuse Monitoring | H0026 | Alcohol And/Or Drug Preventi |
| 11 | Substance Abuse Monitoring | H0027 | Alcohol And/Or Drug Preventi |
| 11 | Substance Abuse Monitoring | H0028 | Alcohol And/Or Drug Preventi |
| 11 | Substance Abuse Monitoring | H0029 | Alcohol And/Or Drug Preventi |
| 11 | Substance Abuse Monitoring | H0049 | Alcohol/Drug Screening       |
| 11 | Substance Abuse Monitoring | H0050 | Alcohol/Drug Service 15 Min  |
| 12 | Smoking Monitoring         | 99406 | BEHAV CHNG SMOKING 3-10 MIN  |



|    |                        |       |                              |
|----|------------------------|-------|------------------------------|
| 12 | Smoking Monitoring     | 99407 | BEHAV CHNG SMOKING > 10 MIN  |
| 12 | Smoking Monitoring     | G0436 | TOBACCO-USE COUNSEL 3-10 MIN |
| 12 | Smoking Monitoring     | G0437 | TOBACCO-USE COUNSEL>10MIN    |
| 13 | Family Psychoeducation | H2027 | Psychoed Svc, Per 15 Min     |
| 14 | Vocational Training    | 0378R |                              |
| 14 | Vocational Training    | 0380R |                              |
| 14 | Vocational Training    | 0385R |                              |
| 14 | Vocational Training    | 0388R |                              |
| 14 | Vocational Training    | 0389R |                              |
| 14 | Vocational Training    | 0390R |                              |
| 14 | Vocational Training    | 0391R |                              |
| 14 | Vocational Training    | 0392R |                              |
| 14 | Vocational Training    | 0393R |                              |
| 14 | Vocational Training    | 0395R |                              |
| 14 | Vocational Training    | 0800V |                              |
| 14 | Vocational Training    | 0801V |                              |
| 14 | Vocational Training    | 0802V |                              |
| 14 | Vocational Training    | 0803V |                              |
| 14 | Vocational Training    | 0808V |                              |
| 14 | Vocational Training    | 0809V |                              |
| 14 | Vocational Training    | 0810V |                              |
| 14 | Vocational Training    | 0811V |                              |
| 14 | Vocational Training    | 0812V |                              |
| 14 | Vocational Training    | 0813V |                              |
| 14 | Vocational Training    | 0821V |                              |
| 14 | Vocational Training    | 0823V |                              |
| 14 | Vocational Training    | 0824V |                              |
| 14 | Vocational Training    | 0830V |                              |
| 14 | Vocational Training    | 0831V |                              |
| 14 | Vocational Training    | 0840V |                              |
| 14 | Vocational Training    | 0841V |                              |
| 14 | Vocational Training    | 0842V |                              |
| 14 | Vocational Training    | 0843V |                              |
| 14 | Vocational Training    | 0881V |                              |

List of the anti-psychotic procedure codes and descriptions.

Procedure Code      Procedure Code Description

|       |                              |
|-------|------------------------------|
| C9470 | Aripiprazole Lauroxil IM     |
| J0401 | Inj Aripiprazole Ext Rel 1mg |
| J1631 | Haloperidol Decanoate Inj    |
| J2358 | Olanzapine Long-Acting Inj   |
| J2426 | Paliperidone Palmitate Inj   |
| J2680 | Fluphenazine Decanoate 25 Mg |
| J2794 | Risperidone, Long Acting     |

List of the Reference Dosage Range for each Antipsychotic

| List of the Reference Dosage Range for each Antipsychotic |                |             |               |                |        |                          |
|-----------------------------------------------------------|----------------|-------------|---------------|----------------|--------|--------------------------|
| AgeGroup                                                  | Active         | Formulation | Patient Count | Average Dosage | SD     | Highest Recommended Dose |
| Adult (Age18-25)                                          | aripiprazole   | SA          | 52            | 48.24          | 9.33   | 30                       |
| Child (Age < 18)                                          | aripiprazole   | SA          | 7             | 45.04          | 4.24   | 30                       |
| Child (Age < 18)                                          | chlorpromazine |             | 1             | 1269.77        | 0      | 1000                     |
| Adult (Age18-25)                                          | chlorpromazine |             | 3             | 1459.44        | 240.48 | 1000                     |
| Child (Age < 18)                                          | clozapine      |             | 2             | 961.05         | 238.96 | 600                      |
| Adult (Age18-25)                                          | clozapine      |             | 1             | 914.29         | 0      | 900                      |
| Child (Age < 18)                                          | fluphenazine   | SA          | 1             | 24.43          | 0      | 10                       |
| Child (Age < 18)                                          | haloperidol    | LAI         | 4             | 6.69           | 2.44   | 0                        |
| Adult (Age18-25)                                          | haloperidol    | LAI         | 5             | 88.18          | 27.48  | 18.9                     |
| Child (Age < 18)                                          | haloperidol    | SA          | 16            | 19.7           | 4.63   | 10                       |
| Adult (Age18-25)                                          | haloperidol    | SA          | 69            | 33.47          | 11.16  | 20                       |
| Adult (Age18-25)                                          | haloperidol    | SAI         | 5             | 31             | 4.9    | 20                       |
| Adult (Age18-25)                                          | iloperidone    |             | 1             | 32             | 0      | 24                       |
| Adult (Age18-25)                                          | loxapine       |             | 6             | 163.76         | 28.33  | 100                      |
| Adult (Age18-25)                                          | lurasidone     |             | 17            | 255.69         | 34.53  | 160                      |
| Adult (Age18-25)                                          | olanzapine     |             | 42            | 44.53          | 8.61   | 30                       |
| Child (Age < 18)                                          | olanzapine     |             | 15            | 35.24          | 15.13  | 20                       |
| Adult (Age18-25)                                          | olanzapine     | SYM         | 1             | 24.72          | 0      | 18                       |
| Adult (Age18-25)                                          | paliperidone   |             | 11            | 17.48          | 2.82   | 12                       |
| Child (Age < 18)                                          | paliperidone   |             | 1             | 18             | 0      | 12                       |
| Adult (Age18-25)                                          | paliperidone   | LAIS        | 10            | 34.76          | 42.03  | 9.8                      |
| Adult (Age18-25)                                          | perphenazine   |             | 11            | 51.49          | 8.7    | 32                       |
| Adult (Age18-25)                                          | quetiapine     |             | 88            | 1190.17        | 193.4  | 800                      |
| Child (Age < 18)                                          | quetiapine     |             | 16            | 1155.1         | 200.76 | 800                      |
| Adult (Age18-25)                                          | risperidone    |             | 36            | 12.47          | 2.43   | 8                        |
| Child (Age < 18)                                          | risperidone    |             | 4             | 9.79           | 2.21   | 6                        |
| Adult (Age18-25)                                          | risperidone    | LAIM        | 1             | 5.32           | 0      | 3.675                    |
| Adult (Age18-25)                                          | thiothixene    |             | 2             | 40.2           | 5.04   | 30                       |

|                  |                 |    |    |        |       |     |
|------------------|-----------------|----|----|--------|-------|-----|
| Adult (Age18-25) | trifluoperazine |    | 1  | 80     | 0     | 40  |
| Adult (Age18-25) | ziprasidone     | SA | 28 | 288.8  | 39.36 | 200 |
| Child (Age < 18) | ziprasidone     | SA | 8  | 250.64 | 38.87 | 160 |
